# Supplementary material for: Heteroleptic Oxidovanadium(V) Complexes with Activity against Infective and Non-Infective Stages of Trypanosoma cruzi
Source: MDPI journal article supplement (doi:10.3390/molecules26175375), 2021-09-03

# checkCIF/PLATON report

Structure factors have been supplied for datablock(s) cu\_191121\_GS

THIS REPORT IS FOR GUIDANCE ONLY. IF USED AS PART OF A REVIEW PROCEDURE FOR PUBLICATION, IT SHOULD NOT REPLACE THE EXPERTISE OF AN EXPERIENCED CRYSTALLOGRAPHIC REFEREE.

No syntax errors found.      CIF dictionary      Interpreting this report

## Datablock: cu\_191121\_GS

---

|                 |                                        |                                |
|-----------------|----------------------------------------|--------------------------------|
| Bond precision: | C-C = 0.0085 A                         | Wavelength=1.54178             |
| Cell:           | a=22.3574(11)                          | b=16.3235(8)      c=16.9294(8) |
|                 | alpha=90                               | beta=90      gamma=90          |
| Temperature:    | 273 K                                  |                                |
|                 | Calculated                             | Reported                       |
| Volume          | 6178.4(5)                              | 6178.4(5)                      |
| Space group     | P c c n                                | P c c n                        |
| Hall group      | -P 2ab 2ac                             | -P 2ab 2ac                     |
| Moiety formula  | 2(C26 H15 Cl I N4 O4 V),<br>3(C4 H8 O) | ?                              |
| Sum formula     | C64 H54 Cl2 I2 N8 O11 V2               | C32 H27 Cl I N4 O5.50 V        |
| Mr              | 1537.73                                | 768.86                         |
| Dx,g cm-3       | 1.653                                  | 1.653                          |
| Z               | 4                                      | 8                              |
| Mu (mm-1)       | 11.744                                 | 11.744                         |
| F000            | 3072.0                                 | 3072.0                         |
| F000'           | 3081.29                                |                                |
| h,k,lmax        | 28,20,21                               | 28,20,21                       |
| Nref            | 6774                                   | 6718                           |
| Tmin,Tmax       | 0.127,0.253                            | 0.421,0.754                    |
| Tmin'           | 0.057                                  |                                |

Correction method= # Reported T Limits: Tmin=0.421 Tmax=0.754  
AbsCorr = MULTI-SCAN

Data completeness= 0.992      Theta(max)= 80.490

R(reflections)= 0.0563( 4416)      wR2(reflections)= 0.1782( 6718)

S = 1.056      Npar= 471

---

The following ALERTS were generated. Each ALERT has the format

**test-name\_ALERT\_alert-type\_alert-level.**

Click on the hyperlinks for more details of the test.

### ● Alert level C

|                   |                                                 |     |         |       |
|-------------------|-------------------------------------------------|-----|---------|-------|
| PLAT260_ALERT_2_C | Large Average Ueq of Residue Including          | O5A | 0.123   | Check |
| PLAT260_ALERT_2_C | Large Average Ueq of Residue Including          | O5B | 0.223   | Check |
| PLAT260_ALERT_2_C | Large Average Ueq of Residue Including          | O5C | 0.223   | Check |
| PLAT342_ALERT_3_C | Low Bond Precision on C-C Bonds .....           |     | 0.00846 | Ang.  |
| PLAT906_ALERT_3_C | Large K Value in the Analysis of Variance ..... |     | 2.782   | Check |

### ● Alert level G

|                   |                                                  |                |       |             |
|-------------------|--------------------------------------------------|----------------|-------|-------------|
| PLAT002_ALERT_2_G | Number of Distance or Angle Restraints on AtSite |                | 15    | Note        |
| PLAT003_ALERT_2_G | Number of Uiso or Uij Restrained non-H Atoms ... |                | 15    | Report      |
| PLAT045_ALERT_1_G | Calculated and Reported Z Differ by a Factor ... |                | 0.50  | Check       |
| PLAT083_ALERT_2_G | SHELXL Second Parameter in WGHT Unusually Large  |                | 9.23  | Why ?       |
| PLAT172_ALERT_4_G | The CIF-Embedded .res File Contains DFIX Records |                | 2     | Report      |
| PLAT175_ALERT_4_G | The CIF-Embedded .res File Contains SAME Records |                | 4     | Report      |
| PLAT178_ALERT_4_G | The CIF-Embedded .res File Contains SIMU Records |                | 2     | Report      |
| PLAT199_ALERT_1_G | Reported _cell_measurement_temperature .....     | (K)            | 273   | Check       |
| PLAT200_ALERT_1_G | Reported _diffrn_ambient_temperature .....       | (K)            | 273   | Check       |
| PLAT300_ALERT_4_G | Atom Site Occupancy of O5A                       | Constrained at | 0.5   | Check       |
| PLAT300_ALERT_4_G | Atom Site Occupancy of ClA                       | Constrained at | 0.5   | Check       |
| PLAT300_ALERT_4_G | Atom Site Occupancy of C2A                       | Constrained at | 0.5   | Check       |
| PLAT300_ALERT_4_G | Atom Site Occupancy of C3A                       | Constrained at | 0.5   | Check       |
| PLAT300_ALERT_4_G | Atom Site Occupancy of C4A                       | Constrained at | 0.5   | Check       |
| PLAT300_ALERT_4_G | Atom Site Occupancy of H1AA                      | Constrained at | 0.5   | Check       |
| PLAT300_ALERT_4_G | Atom Site Occupancy of H1AB                      | Constrained at | 0.5   | Check       |
| PLAT300_ALERT_4_G | Atom Site Occupancy of H2AA                      | Constrained at | 0.5   | Check       |
| PLAT300_ALERT_4_G | Atom Site Occupancy of H2AB                      | Constrained at | 0.5   | Check       |
| PLAT300_ALERT_4_G | Atom Site Occupancy of H3AA                      | Constrained at | 0.5   | Check       |
| PLAT300_ALERT_4_G | Atom Site Occupancy of H3AB                      | Constrained at | 0.5   | Check       |
| PLAT300_ALERT_4_G | Atom Site Occupancy of H4AA                      | Constrained at | 0.5   | Check       |
| PLAT300_ALERT_4_G | Atom Site Occupancy of H4AB                      | Constrained at | 0.5   | Check       |
| PLAT302_ALERT_4_G | Anion/Solvent/Minor-Residue Disorder (Resd 2 )   |                | 100%  | Note        |
| PLAT302_ALERT_4_G | Anion/Solvent/Minor-Residue Disorder (Resd 3 )   |                | 100%  | Note        |
| PLAT302_ALERT_4_G | Anion/Solvent/Minor-Residue Disorder (Resd 4 )   |                | 100%  | Note        |
| PLAT304_ALERT_4_G | Non-Integer Number of Atoms in .....             | (Resd 2 )      | 6.50  | Check       |
| PLAT304_ALERT_4_G | Non-Integer Number of Atoms in .....             | (Resd 3 )      | 6.73  | Check       |
| PLAT304_ALERT_4_G | Non-Integer Number of Atoms in .....             | (Resd 4 )      | 6.27  | Check       |
| PLAT398_ALERT_2_G | Deviating C-O-C Angle From 120 for O5A           |                | 99.2  | Degree      |
| PLAT398_ALERT_2_G | Deviating C-O-C Angle From 120 for O5B           |                | 99.1  | Degree      |
| PLAT398_ALERT_2_G | Deviating C-O-C Angle From 120 for O5C           |                | 98.1  | Degree      |
| PLAT411_ALERT_2_G | Short Inter H...H Contact H3 ..H3CB .            |                | 1.73  | Ang.        |
|                   | x,3/2-y,-1/2+z =                                 |                | 7_575 | Check       |
| PLAT411_ALERT_2_G | Short Inter H...H Contact H4AA ..H18 .           |                | 1.96  | Ang.        |
|                   | x,y,z =                                          |                | 1_555 | Check       |
| PLAT411_ALERT_2_G | Short Inter H...H Contact H4AB ..H18 .           |                | 1.63  | Ang.        |
|                   | 1/2-x,3/2-y,z =                                  |                | 2_565 | Check       |
| PLAT431_ALERT_2_G | Short Inter HL..A Contact I1 ..N2 .              |                | 3.21  | Ang.        |
|                   | x,3/2-y,-1/2+z =                                 |                | 7_575 | Check       |
| PLAT720_ALERT_4_G | Number of Unusual/Non-Standard Labels .....      |                | 29    | Note        |
| PLAT721_ALERT_1_G | Bond Calc 0.96000, Rep 0.97000 Dev...            |                | 0.01  | Ang.        |
|                   | C2A -H2AA 1.555 1.555 .....                      | #              | 66    | Check       |
| PLAT789_ALERT_4_G | Atoms with Negative _atom_site_disorder_group #  |                | 13    | Check       |
| PLAT860_ALERT_3_G | Number of Least-Squares Restraints .....         |                | 252   | Note        |
| PLAT883_ALERT_1_G | No Info/Value for _atom_sites_solution_primary . |                |       | Please Do ! |
| PLAT912_ALERT_4_G | Missing # of FCF Reflections Above STh/L= 0.600  |                | 57    | Note        |
| PLAT978_ALERT_2_G | Number C-C Bonds with Positive Residual Density. |                | 2     | Info        |

---

0 **ALERT level A** = Most likely a serious problem - resolve or explain  
0 **ALERT level B** = A potentially serious problem, consider carefully  
5 **ALERT level C** = Check. Ensure it is not caused by an omission or oversight  
43 **ALERT level G** = General information/check it is not something unexpected

5 ALERT type 1 CIF construction/syntax error, inconsistent or missing data  
14 ALERT type 2 Indicator that the structure model may be wrong or deficient  
3 ALERT type 3 Indicator that the structure quality may be low  
25 ALERT type 4 Improvement, methodology, query or suggestion  
1 ALERT type 5 Informative message, check

---

### Validation response form

Please find below a validation response form (VRF) that can be filled in and pasted into your CIF.

```
# start Validation Reply Form
_vrf_PLAT260_cu_191121_GS
;
PROBLEM: Large Average Ueq of Residue Including          O5A          0.123 Check
RESPONSE: ...
;
_vrf_PLAT342_cu_191121_GS
;
PROBLEM: Low Bond Precision on  C-C Bonds .....          0.00846 Ang.
RESPONSE: ...
;
_vrf_PLAT906_cu_191121_GS
;
PROBLEM: Large K Value in the Analysis of Variance .....          2.782 Check
RESPONSE: ...
;
# end Validation Reply Form
```

---

It is advisable to attempt to resolve as many as possible of the alerts in all categories. Often the minor alerts point to easily fixed oversights, errors and omissions in your CIF or refinement strategy, so attention to these fine details can be worthwhile. In order to resolve some of the more serious problems it may be necessary to carry out additional measurements or structure refinements. However, the purpose of your study may justify the reported deviations and the more serious of these should normally be commented upon in the discussion or experimental section of a paper or in the "special\_details" fields of the CIF. checkCIF was carefully designed to identify outliers and unusual parameters, but every test has its limitations and alerts that are not important in a particular case may appear. Conversely, the absence of alerts does not guarantee there are no aspects of the results needing attention. It is up to the individual to critically assess their own results and, if necessary, seek expert advice.

### **Publication of your CIF in IUCr journals**

A basic structural check has been run on your CIF. These basic checks will be run on all CIFs submitted for publication in IUCr journals (*Acta Crystallographica*, *Journal of Applied Crystallography*, *Journal of Synchrotron Radiation*); however, if you intend to submit to *Acta Crystallographica Section C* or *E* or *IUCrData*, you should make sure that full publication checks are run on the final version of your CIF prior to submission.

### **Publication of your CIF in other journals**

Please refer to the *Notes for Authors* of the relevant journal for any special instructions relating to CIF submission.

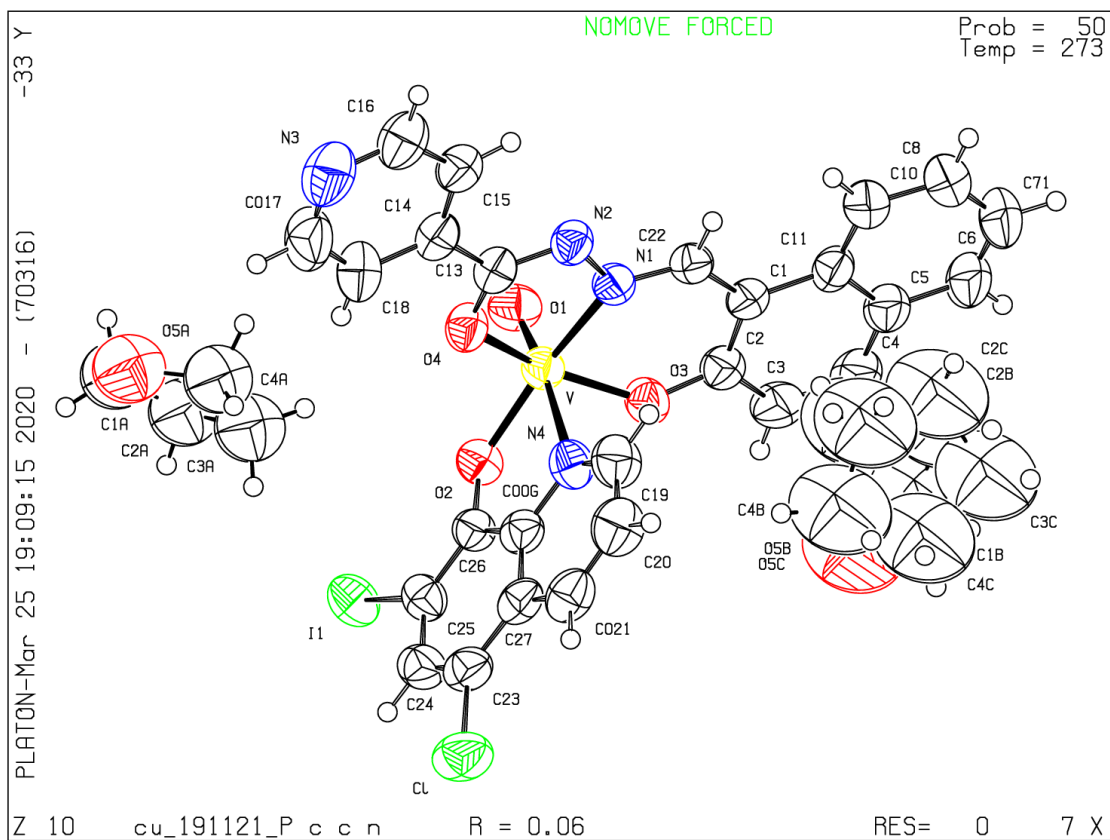

Supplement: s1 [file s1]
