# Supplementary material for: Heteroleptic Oxidovanadium(V) Complexes with Activity against Infective and Non-Infective Stages of Trypanosoma cruzi
Source: MDPI journal article supplement (doi:10.3390/molecules26175375), 2021-09-03
Supplement: s1 [file s1]

Supplementary Material

# Heteroleptic Oxidovanadium(V) Complexes with Activity Against Infective and Non-Infective Stages of *Trypanosoma cruzi*

Gonzalo Scalese <sup>1,2</sup>, Ignacio Machado <sup>3</sup>, Gustavo Salinas <sup>4,5</sup>, Leticia Pérez-Díaz <sup>6</sup> and Dinorah Gambino <sup>1,\*</sup>

<sup>1</sup> Área Química Inorgánica, Facultad de Química, Universidad de la República, 11800 Montevideo, Uruguay; gscalese@fq.edu.uy

<sup>2</sup> Programa de Posgrados de la Facultad de Química, Universidad de la República, 11800 Montevideo, Uruguay

<sup>3</sup> Área Química Analítica, Facultad de Química, Universidad de la República, 11800 Montevideo, Uruguay; imachado@fq.edu.uy

<sup>4</sup> Worm Biology Lab, Institut Pasteur de Montevideo, 1400 Montevideo, Uruguay; gsalinas@pasteur.edu.uy

<sup>5</sup> Departamento de Biociencias, Facultad de Química, 11800 Montevideo, Uruguay; gsalinas@pasteur.edu.uy

<sup>6</sup> Laboratorio de Interacciones Moleculares, Facultad de Ciencias, Universidad de la República, 1400 Montevideo, Uruguay; lperez@fcien.edu.uy

\* Correspondence: dgambino@fq.edu.uy; Tel.: +598 29249739

**Table S1.** Tentative assignment of selected IR bands of the [V<sup>VO</sup>(IN-2H)(L-H)] complexes. Bands for the free ligands L0-L4, IN and the [V<sup>VO</sup>O<sub>2</sub>(IN-H)] are included for comparison. Band positions are given in cm<sup>-1</sup>.

| Compound                                | $\nu(\text{VO})$ | $\nu(\text{Ar-OH})$ | $\nu(\text{NH})$ | $\nu(\text{CO})$ | $\nu(\text{CN})$ |
|-----------------------------------------|------------------|---------------------|------------------|------------------|------------------|
| IN                                      | -                | 3213 m              | 3038 m           | 1680 s           | 1575 s           |
| [V <sup>VO</sup> O <sub>2</sub> (IN-H)] | 915 s; 827 m     | -                   | 3074 w           | 1633 m           | 1597 s           |
| L0 <sup>[a]</sup>                       | -                | 3159 b              | -                | -                | 1624 vw          |
| [V <sup>VO</sup> O(IN-2H)(L0-H)]        | 974 s            | -                   | -                | 1620 w           | 1594 s           |
| L1 <sup>[a]</sup>                       | -                | 3132 b              | -                | -                | 1615 w           |
| [V <sup>VO</sup> O(IN-2H)(L1-H)]        | 978 s            | -                   | -                | 1618 w           | 1593s            |
| L2 <sup>[a]</sup>                       | -                | 3132 b              | -                | -                | 1605 w           |
| [V <sup>VO</sup> O(IN-2H)(L2-H)]        | 972 s            | -                   | -                | 1618 w           | 1593 s           |
| L3 <sup>[a]</sup>                       | -                | 3026 b              | -                | -                | 1576 vw          |
| [V <sup>VO</sup> O(IN-2H)(L3-H)]        | 966 s            | -                   | -                | 1620 w           | 1593 s           |
| L4 <sup>[b]</sup>                       | -                | 3235 b              | -                | -                | 1628 vw          |
| [V <sup>VO</sup> O(IN-2H)(L4-H)]        | 968 s            | -                   | -                | 1618 w           | 1593 m           |

s:strong; w: weak; vw: very weak; m: medium; b: broad; sh; shoulder

<sup>[a]</sup> data from reference [44]

<sup>[b]</sup> data from reference [42]

**Table S2.** Selected bond lengths [Å] and angles around vanadium(V) [°] in [V<sup>VO</sup>(IN-2H)(L2-H)]·1.5 THF

| Bond distances |  |            |
|----------------|--|------------|
| V-O(1)         |  | 1.590(4)   |
| V-O(2)         |  | 1.853(4)   |
| V-O(3)         |  | 1.845(4)   |
| V-O(4)         |  | 1.931(4)   |
| V-N(1)         |  | 2.077(4)   |
| V-N(4)         |  | 2.390(4)   |
| Bond angles    |  |            |
| O(1)-V-O(2)    |  | 100.28(18) |
| O(1)-V-O(3)    |  | 100.40(2)  |
| O(2)-V-O(3)    |  | 100.89(17) |
| O(1)-V-O(4)    |  | 97.78(19)  |
| O(2)-V-O(4)    |  | 94.58(16)  |
| O(3)-V-O(4)    |  | 153.51(18) |
| O(1)-V-N(1)    |  | 99.07(19)  |
| O(2)-V-N(1)    |  | 159.31(16) |
| O(3)-V-N(1)    |  | 82.65(17)  |
| O(4)-V-N(1)    |  | 75.57(16)  |
| O(1)-V-N(4)    |  | 174.39(19) |
| O(2)-V-N(4)    |  | 75.21(15)  |
| O(3)-V-N(4)    |  | 83.86(18)  |
| O(4)-V-N(4)    |  | 79.45(16)  |
| N(1)-V-N(4)    |  | 85.01(16)  |

**Table S3.**  $^1\text{H}$ -NMR signals of the  $[\text{V}^{\text{VO}}(\text{IN}-2\text{H})(\text{L}-\text{H})]$  complexes in  $\text{DMSO}-d_6$  at  $25^\circ\text{C}$  ( $\delta$ , ppm). Free ligands are included for comparison.
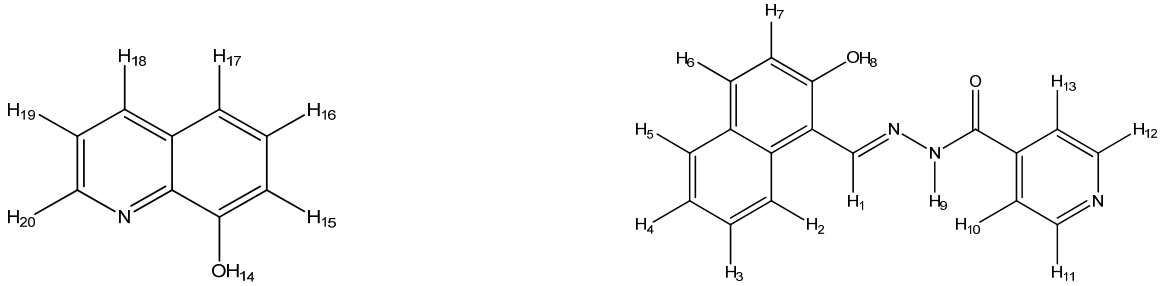

| H  | $[\text{V}^{\text{VO}}(\text{IN}-2\text{H})(\text{L0}-\text{H})]$ |                           |                | $[\text{V}^{\text{VO}}(\text{IN}-2\text{H})(\text{L1}-\text{H})]$ |                           |                | $[\text{V}^{\text{VO}}(\text{IN}-2\text{H})(\text{L2}-\text{H})]$ |                           |                | $[\text{V}^{\text{VO}}(\text{IN}-2\text{H})(\text{L3}-\text{H})]$ |                           |                | $[\text{V}^{\text{VO}}(\text{IN}-2\text{H})(\text{L4}-\text{H})]$ |                           |                |
|----|-------------------------------------------------------------------|---------------------------|----------------|-------------------------------------------------------------------|---------------------------|----------------|-------------------------------------------------------------------|---------------------------|----------------|-------------------------------------------------------------------|---------------------------|----------------|-------------------------------------------------------------------|---------------------------|----------------|
|    | $\delta_{\text{ligand}}$                                          | $\delta_{\text{complex}}$ | $\Delta\delta$ |
| 1  | 9.48                                                              | 10.12                     | 0.64           | 9.48                                                              | 10.15                     | 0.67           | 9.48                                                              | 10.14                     | 0.66           | 9.48                                                              | 10.14                     | 0.66           | 9.48                                                              | 10.18                     | 0.70           |
| 2  | 8.32                                                              | 8.68                      | 0.36           | 8.32                                                              | 8.66                      | 0.34           | 8.32                                                              | 8.63                      | 0.31           | 8.32                                                              | 8.62                      | 0.30           | 8.32                                                              | 8.67                      | 0.35           |
| 3  | 7.62                                                              | 7.77                      | 0.15           | 7.62                                                              | 7.75                      | 0.13           | 7.62                                                              | 7.75                      | 0.13           | 7.62                                                              | 7.75                      | 0.13           | 7.62                                                              | 7.76                      | 0.14           |
| 4  | 7.42                                                              | 7.58                      | 0.16           | 7.42                                                              | 7.54                      | 0.12           | 7.42                                                              | 7.54                      | 0.12           | 7.42                                                              | 7.54                      | 0.12           | 7.42                                                              | 7.56                      | 0.14           |
| 5  | 7.89                                                              | 7.98                      | 0.09           | 7.89                                                              | 7.98                      | 0.09           | 7.89                                                              | 7.98                      | 0.09           | 7.89                                                              | 7.98                      | 0.09           | 7.89                                                              | 8.00                      | 0.11           |
| 6  | 7.95                                                              | 8.17                      | 0.22           | 7.95                                                              | 8.21                      | 0.26           | 7.95                                                              | 8.20                      | 0.25           | 7.95                                                              | 8.20                      | 0.25           | 7.95                                                              | 8.23                      | 0.28           |
| 7  | 7.25                                                              | 7.10                      | -0.15          | 7.25                                                              | 7.14                      | -0.11          | 7.25                                                              | 7.14                      | -0.11          | 7.25                                                              | 7.12                      | -0.13          | 7.25                                                              | 7.14                      | -0.11          |
| 8  | 12.53                                                             | -                         | -              | 12.53                                                             | -                         | -              | 12.53                                                             | -                         | -              | 12.53                                                             | -                         | -              | 12.53                                                             | -                         | -              |
| 9  | 12.40                                                             | -                         | -              | 12.40                                                             | -                         | -              | 12.40                                                             | -                         | -              | 12.40                                                             | -                         | -              | 12.40                                                             | -                         | -              |
| 10 | 7.89                                                              | 7.62                      | -0.19          | 7.89                                                              | 7.62                      | -0.27          | 7.89                                                              | 7.61                      | -0.28          | 7.89                                                              | 7.61                      | -0.28          | 7.89                                                              | 7.61                      | -0.28          |
| 11 | 8.84                                                              | 8.62                      | -0.22          | 8.84                                                              | 8.61                      | -0.23          | 8.84                                                              | 8.63                      | -0.21          | 8.84                                                              | 8.62                      | -0.22          | 8.84                                                              | 8.62                      | -0.22          |
| 12 | 8.84                                                              | 8.62                      | -0.22          | 8.84                                                              | 8.61                      | -0.23          | 8.84                                                              | 8.63                      | -0.21          | 8.84                                                              | 8.62                      | -0.22          | 8.84                                                              | 8.62                      | -0.22          |
| 13 | 7.89                                                              | 7.62                      | -0.19          | 7.89                                                              | 7.62                      | -0.27          | 7.89                                                              | 7.61                      | -0.28          | 7.89                                                              | 7.61                      | -0.28          | 7.89                                                              | 7.61                      | -0.28          |
| 14 | 9.82                                                              | -                         | -              | 11.00                                                             | -                         | -              | 11.07                                                             | -                         | -              | *                                                                 | -                         | -              | *                                                                 | -                         | -              |
| 15 | 7.09                                                              | 7.77                      | 0.68           | -                                                                 | -                         | -              | -                                                                 | -                         | -              | -                                                                 | -                         | -              | 7.20                                                              | 7.46                      | 0.26           |
| 16 | 7.41                                                              | 7.20                      | -0.21          | 7.82                                                              | 8.19                      | 0.37           | 8.00                                                              | 8.35                      | 0.35           | 8.34                                                              | 8.69                      | 0.35           | 8.55                                                              | 8.78                      | 0.23           |
| 17 | 7.41                                                              | 7.77                      | 0.36           | -                                                                 | -                         | -              | -                                                                 | -                         | -              | -                                                                 | -                         | -              | -                                                                 | -                         | -              |
| 18 | 8.32                                                              | 8.55                      | 0.22           | 8.50                                                              | 8.61                      | 0.11           | 8.50                                                              | 8.57                      | 0.07           | 8.29                                                              | 8.35                      | 0.06           | 9.15                                                              | 9.15                      | 0.00           |
| 19 | 7.53                                                              | 7.60                      | -0.07          | 7.85                                                              | 7.67                      | -0.15          | 7.77                                                              | 7.67                      | -0.10          | 7.73                                                              | 7.63                      | -0.10          | 7.89                                                              | 7.80                      | -0.09          |
| 20 | 8.85                                                              | 8.22                      | -0.63          | 9.00                                                              | 8.34                      | -0.65          | 8.97                                                              | 8.29                      | -0.68          | 8.87                                                              | 8.20                      | -0.67          | 9.02                                                              | 8.36                      | -0.66          |

 $\Delta\delta = \delta_{\text{complex}} - \delta_{\text{ligand}}$  \*Not observed

**Table S4.** Crystal data and structure refinement results for IN and [V<sup>VO</sup>(IN-2H)(L2-H)]·1.5 THF

|                                                  | IN                                                            | [V <sup>VO</sup> (IN-2H)(L2-H)]·1.5 THF                              |
|--------------------------------------------------|---------------------------------------------------------------|----------------------------------------------------------------------|
| Formula                                          | C <sub>17</sub> H <sub>13</sub> N <sub>3</sub> O <sub>2</sub> | C <sub>32</sub> H <sub>27</sub> ClIN <sub>4</sub> O <sub>5.5</sub> V |
| Formula weight                                   | 291.30                                                        | 768.86                                                               |
| Temperature (K)                                  | 273(2)                                                        | 273(2)                                                               |
| Wavelength (Å)                                   | CuKα (λ = 1.54178)                                            | CuKα (λ = 1.54178)                                                   |
| Crystal system                                   | monoclinic                                                    | orthorhombic                                                         |
| Space group                                      | P2 <sub>1</sub> /c                                            | Pccn                                                                 |
| Unit cell dimensions                             |                                                               |                                                                      |
| a (Å)                                            | 8.786(2)                                                      | 22.3574(11)                                                          |
| b (Å)                                            | 10.252(2)                                                     | 16.3235(8)                                                           |
| c (Å)                                            | 15.793(5)                                                     | 16.9294(8)                                                           |
| β (°)                                            | 99.423(10)                                                    |                                                                      |
| Volume (Å <sup>3</sup> )                         | 1403.5(7)                                                     | 6178.4(5)                                                            |
| Z, density (calculated, g cm <sup>-3</sup> )     | 4; 1.379                                                      | 8; 1.653                                                             |
| Absorption coefficient (mm <sup>-1</sup> )       | 0.759                                                         | 11.744                                                               |
| F(000)                                           | 608.0                                                         | 3072.0                                                               |
| Crystal shape/color                              | Needle / yellow                                               | Needle / dark purple                                                 |
| Crystal size (mm <sup>3</sup> )                  | 0.326 × 0.233 × 0.155                                         | 0.210 × 0.180 × 0.117                                                |
| θ-range (°) for data collection                  | 10.2 to 160.4                                                 | 6.704 to 160.98                                                      |
| Index ranges                                     | -11 ≤ h ≤ 11, -12 ≤ k ≤ 12,<br>-19 ≤ l ≤ 19                   | -28 ≤ h ≤ 21, -20 ≤ k ≤ 20,<br>-21 ≤ l ≤ 19                          |
| Reflections collected                            | 22284                                                         | 60109                                                                |
| Independent reflections                          | 3009                                                          | 6718                                                                 |
|                                                  | [R <sub>int</sub> = 0.0376, R <sub>sigma</sub> = 0.0273]      | [R <sub>int</sub> = 0.0823, R <sub>sigma</sub> = 0.0409]             |
| Observed reflections [I > 2σ(I)]                 | 3009                                                          | 6718                                                                 |
| Completeness (%)                                 | 98.4                                                          | 99.2                                                                 |
| Absorption correction                            | multi-scan                                                    | multi-scan                                                           |
| Max. and min. transmission                       | 0.7543 and 0.6386                                             | 0.7538 and 0.4239                                                    |
| Refinement method                                | Full-matrix least-squares on F <sup>2</sup>                   | Full-matrix least-squares on F <sup>2</sup>                          |
| Data / restraints / parameters                   | 2009/0/208                                                    | 6718/252/471                                                         |
| Goodness-of-fit on F <sup>2</sup>                | 1.033                                                         | 1.056                                                                |
| Final R indices <sup>a</sup> [I > 2σ(I)]         | R <sub>1</sub> = 0.0470, wR <sub>2</sub> = 0.1303             | R <sub>1</sub> = 0.0563, wR <sub>2</sub> = 0.1505                    |
| R indices (all data)                             | R <sub>1</sub> = 0.0556, wR <sub>2</sub> = 0.1404             | R <sub>1</sub> = 0.0895, wR <sub>2</sub> = 0.1782                    |
| Largest diff. peak and hole (e.Å <sup>-3</sup> ) | 0.21/-0.23                                                    | 0.85/-1.05                                                           |

<sup>a</sup>R<sub>1</sub> = Σ||F<sub>o</sub>|-|F<sub>c</sub>||/Σ|F<sub>o</sub>|, wR<sub>2</sub> = [Σw(|F<sub>o</sub>|<sup>2</sup>-|F<sub>c</sub>|<sup>2</sup>)<sup>2</sup>/Σw(|F<sub>o</sub>|<sup>2</sup>)<sup>2</sup>]<sup>1/2</sup>

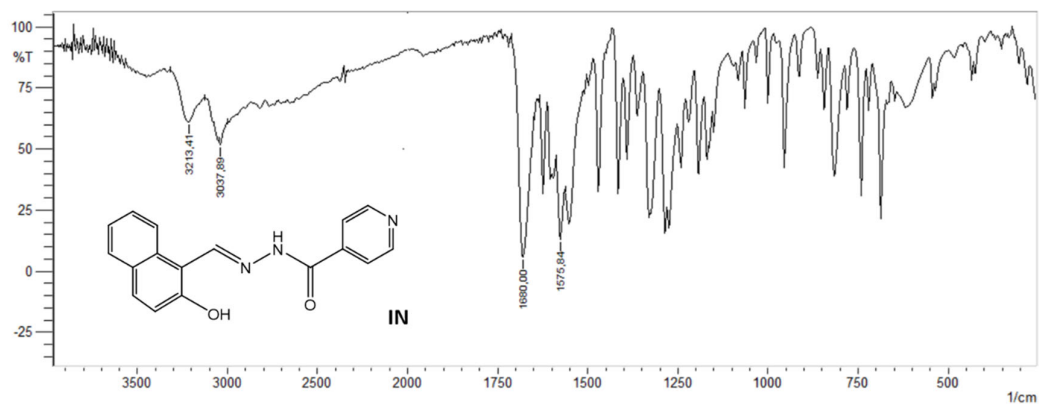

Figure S1. Infrared spectra of IN free ligand (4000–400 cm<sup>-1</sup>).

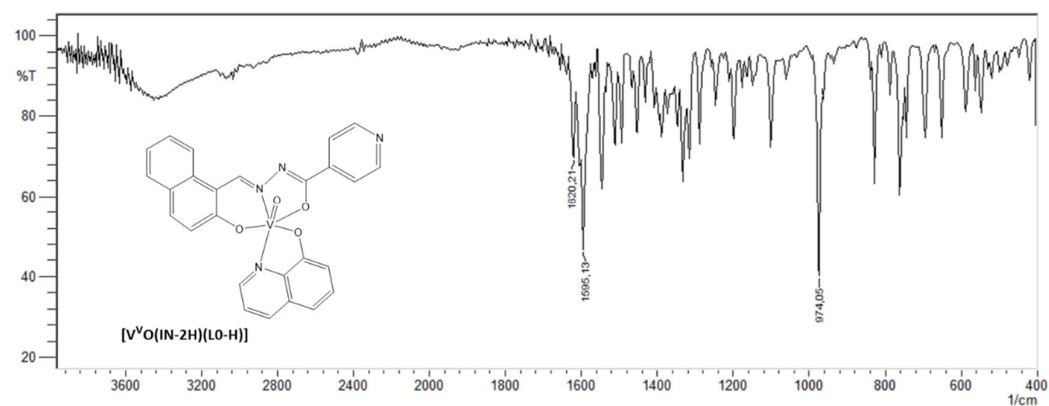

Figure S2. Infrared spectra of [VO(IN-2H)(L0-H)] (4000–400 cm<sup>-1</sup>).

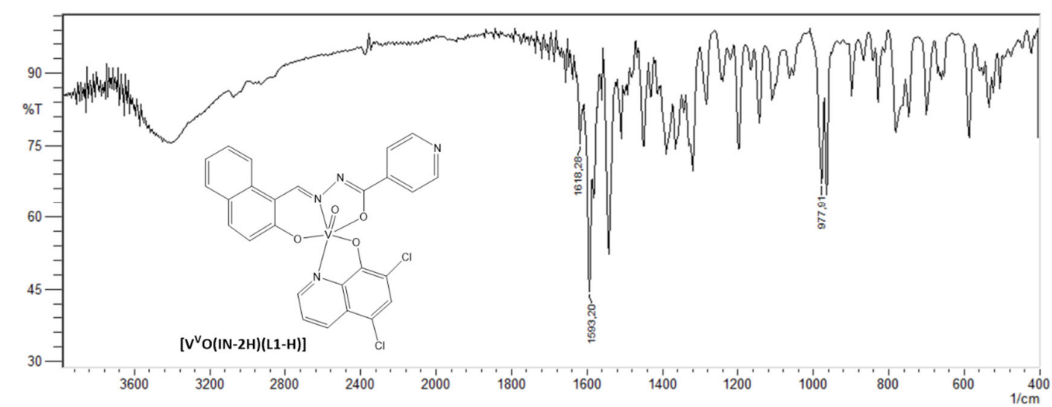

Figure S3. Infrared spectra of [VO(IN-2H)(L1-H)] (4000–400 cm<sup>-1</sup>).

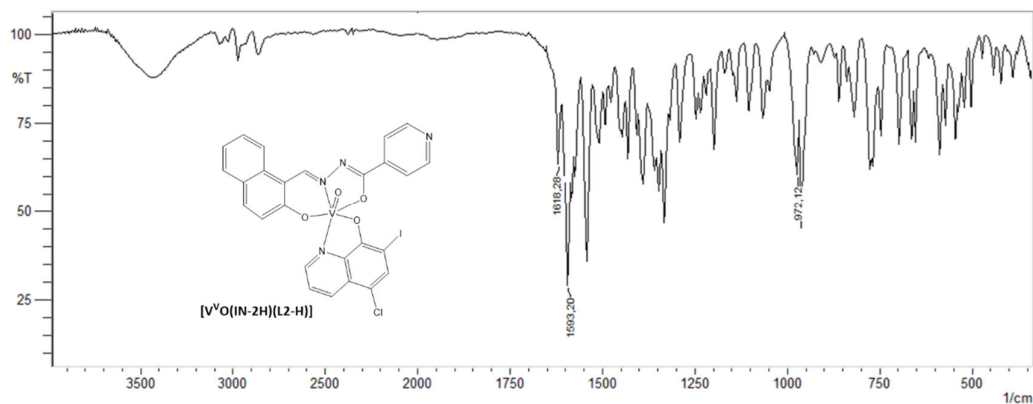

Figure S4. Infrared spectra of [VO(IN-2H)(L2-H)] (4000–400 cm<sup>-1</sup>).

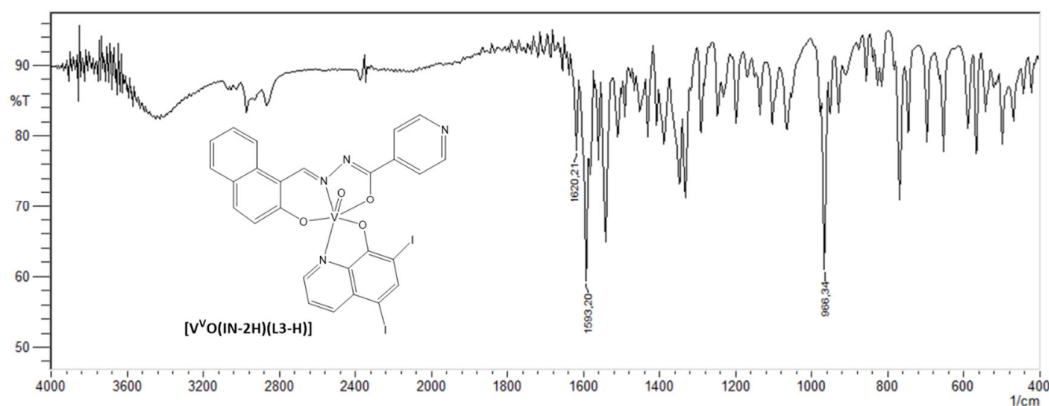

Figure S5. Infrared spectra of [VO(IN-2H)(L3-H)] (4000–400 cm<sup>-1</sup>).

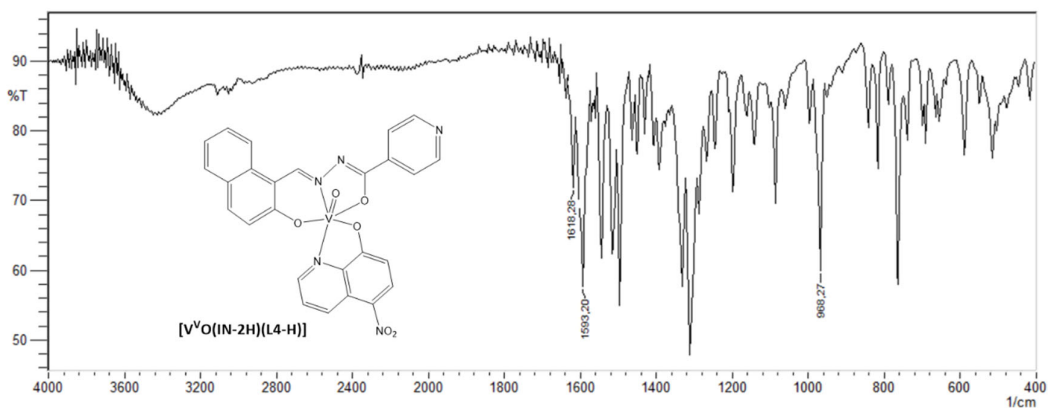

Figure S6. Infrared spectra of [VO(IN-2H)(L4-H)] (4000–400 cm<sup>-1</sup>).

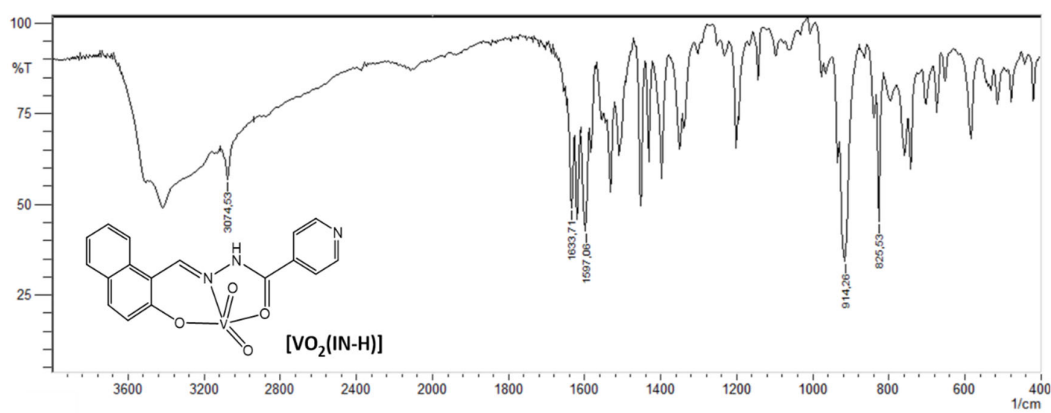

Figure S7. Infrared spectra of  $[VO(IN-2H)(L4-H)]$  (4000–400  $cm^{-1}$ ).

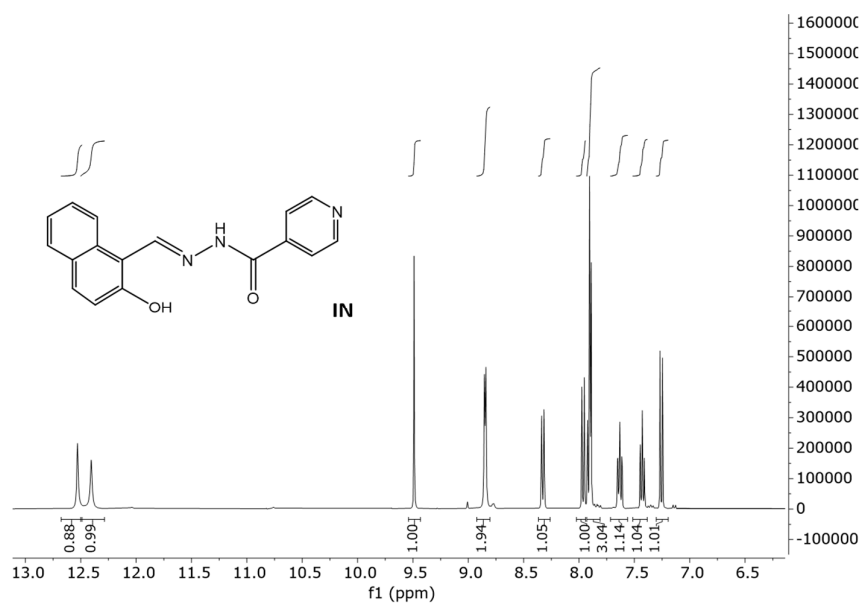

Figure S8.  $^1H$ -NMR spectra for IN free ligand

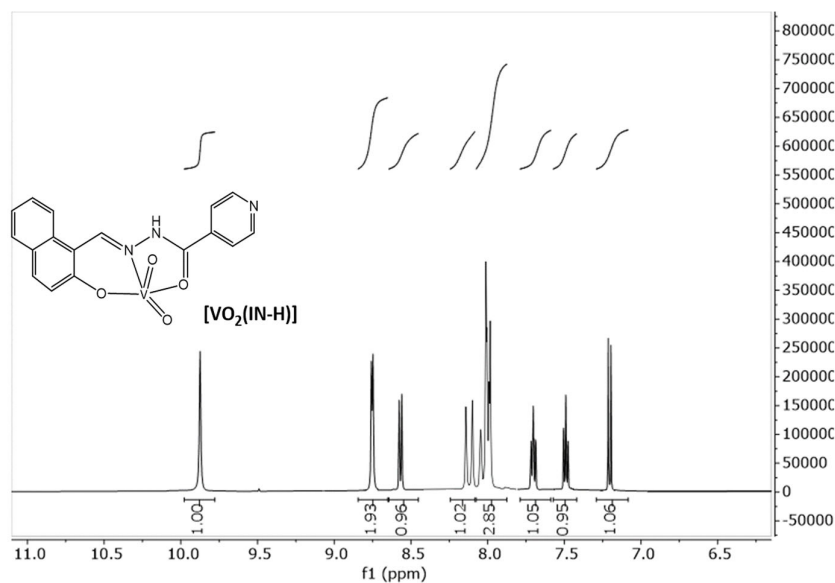

Figure S9.  $^1\text{H}$ -NMR spectra) for  $[\text{VO}_2(\text{IN-H})]$

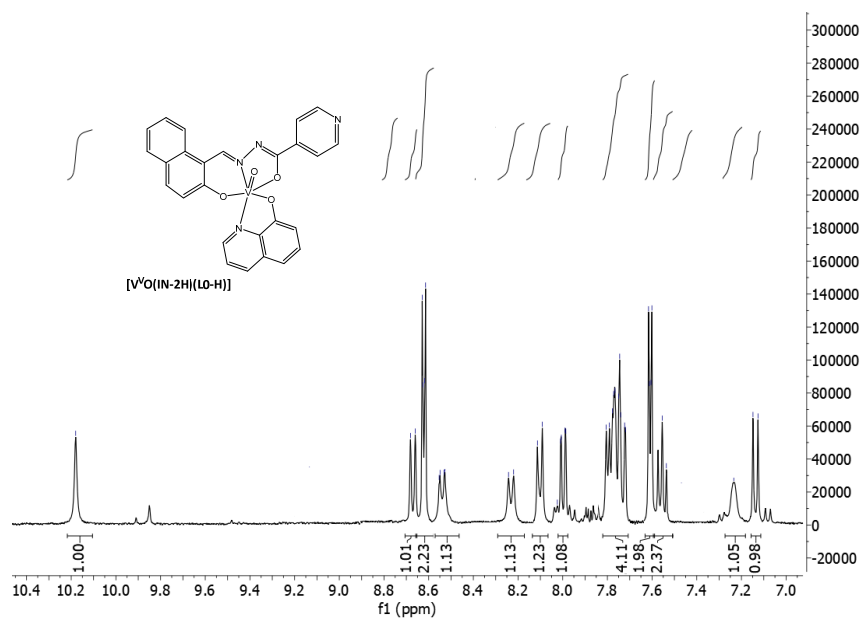



**Figure S10.**  $^1\text{H}$ -NMR spectra for  $[\text{VO}(\text{IN-2H})(\text{L0-H})]$ 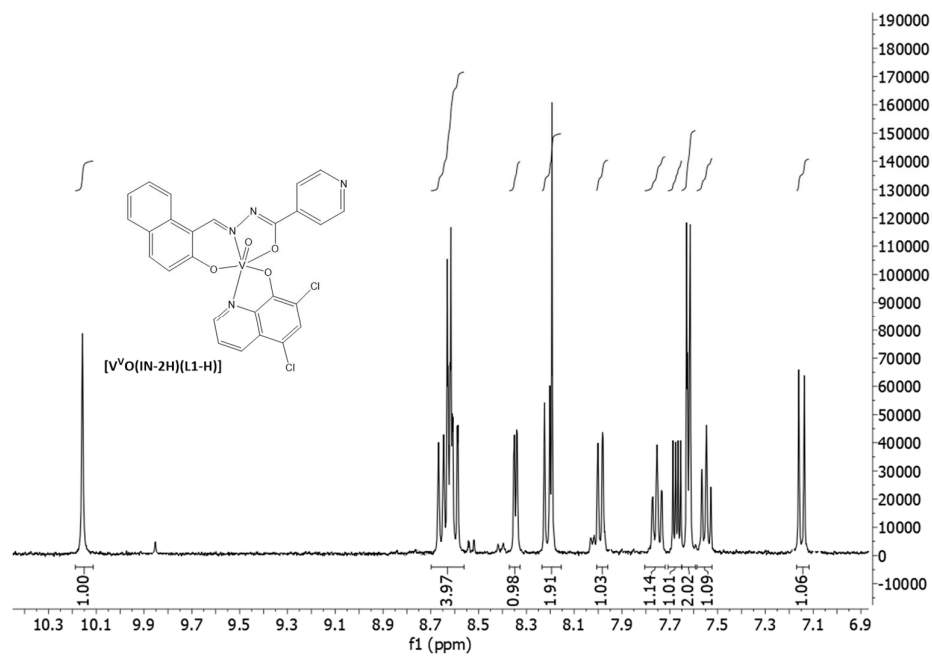**Figure S11.**  $^1\text{H}$ -NMR spectra for  $[\text{VO}(\text{IN-2H})(\text{L1-H})]$ 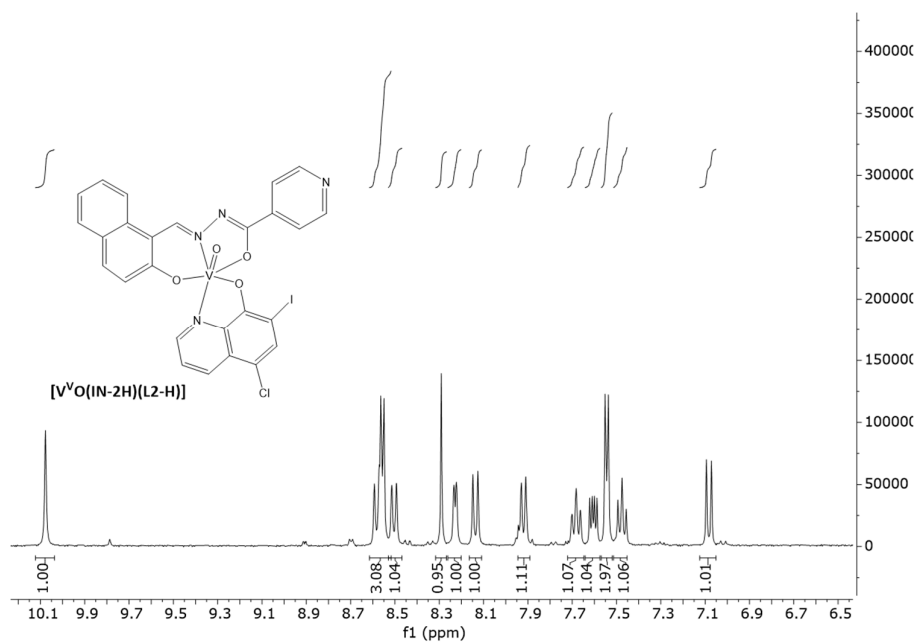**Figure S12.**  $^1\text{H}$ -NMR spectra for  $[\text{VO}(\text{IN-2H})(\text{L2-H})]$

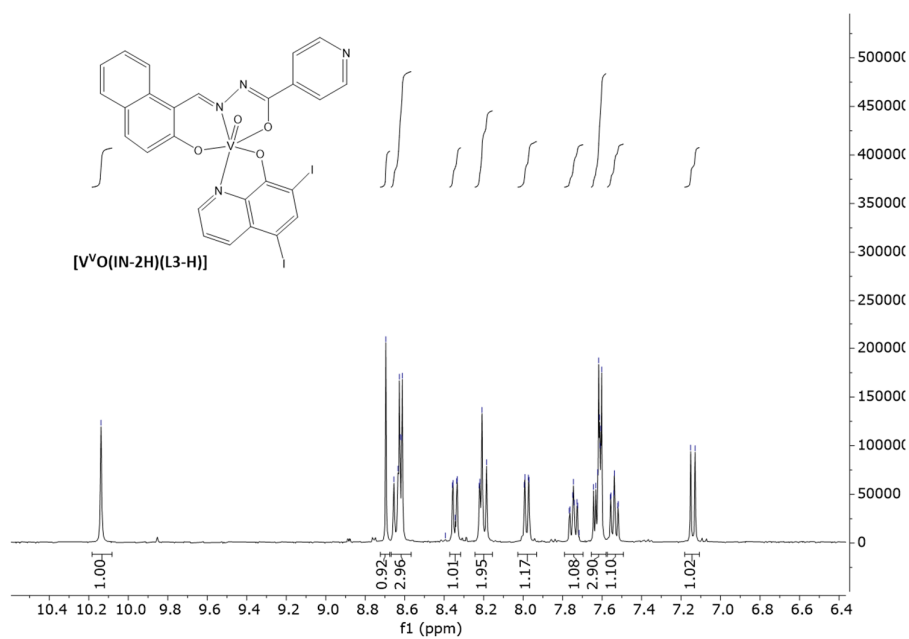

Figure S13.  $^1H$ -NMR spectra for  $[VO(IN-2H)(L3-H)]$

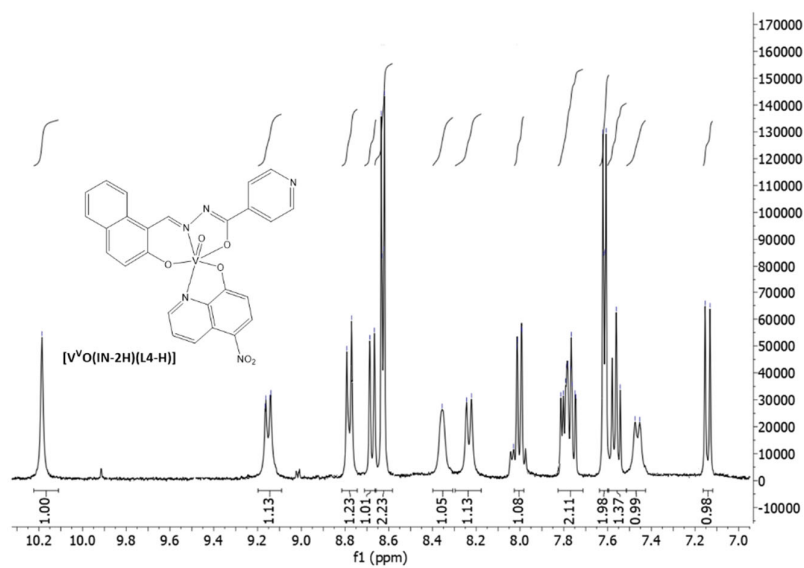

Figure S14.  $^1H$ -NMR spectra for  $[VO(IN-2H)(L4-H)]$

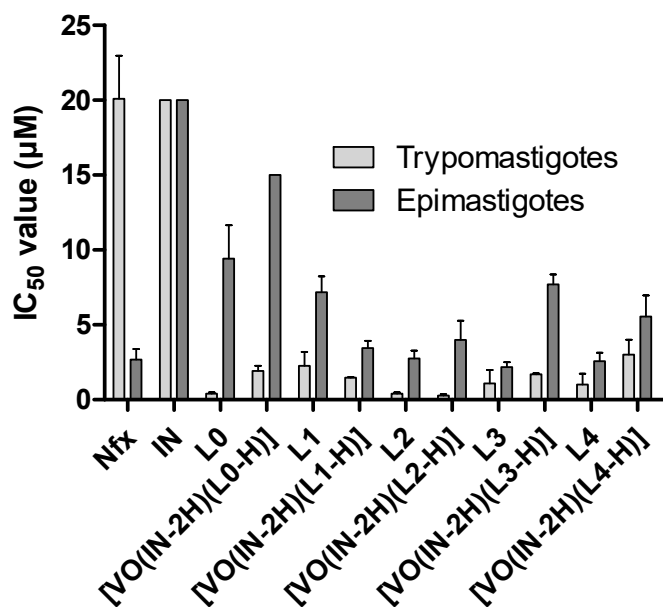

**Figure S15.** IC<sub>50</sub> values on epimastigotes and trypomastigotes of *T. cruzi* of the new V<sup>VO</sup>-complexes comparing to free ligands and reference drug Nifurtimox (Nfx).
